# Supplementary material for: Electronic configuration modulation of tin dioxide by phosphorus dopant for pathway change in electrocatalytic water oxidation
Source: Royal Society of Chemistry journal article supplement (doi:10.1039/d1qi01169c), 2021-11-03
Supplement: d1qi01169c1.pdf [file d1qi01169c1.pdf]

## Supporting Information

### **Electronic configuration modulation of tin dioxide by phosphorus dopant for pathway change in electrocatalytic water oxidation**

Hao Wan,<sup>a</sup> Xue Xiao,<sup>b</sup> Wei Ma,<sup>a</sup> Ying Zhang,<sup>a</sup> Xiaohe Liu,<sup>\*a,b</sup> Yanyu Liu,<sup>\*c</sup> Gen Chen,<sup>b</sup> Ning Zhang,<sup>b</sup> Yijun Cao,<sup>a</sup> Renzhi Ma<sup>\*d</sup>

<sup>a</sup> School of Chemical Engineering, Zhengzhou University, Zhengzhou 450001, PR China. E-mail: liuxh@csu.edu.cn

<sup>b</sup> State Key Laboratory of Powder Metallurgy and School of Materials Science and Engineering, Central South University, Changsha, Hunan 410083, P.R. China.

<sup>c</sup> College of Physics and Materials Science, Tianjin Normal University, Tianjin 300387, PR China. E-mail: yylu@tjnu.edu.cn

<sup>d</sup> World Premier International Center for Materials Nanoarchitectonics (WPI-MANA), National Institute for Materials Science (NIMS), Namiki 1-1, Tsukuba, Ibaraki 305-0044, Japan. Email: MA.Renzhi@nims.go.jp



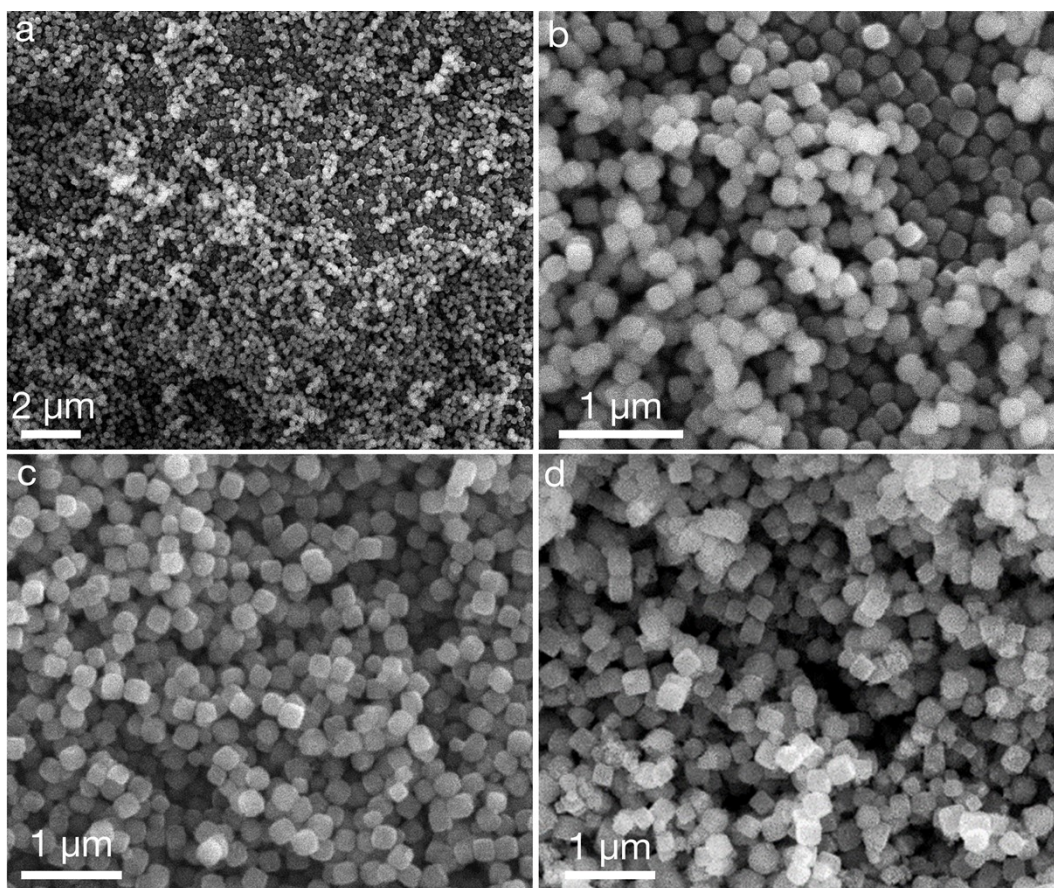

**Fig. S3.** SEM images of (a, b)  $\text{CoSn(OH)}_6$ , (c) calcined product and (d) acid-treated sample, i.e.  $\text{SnO}_2$ .

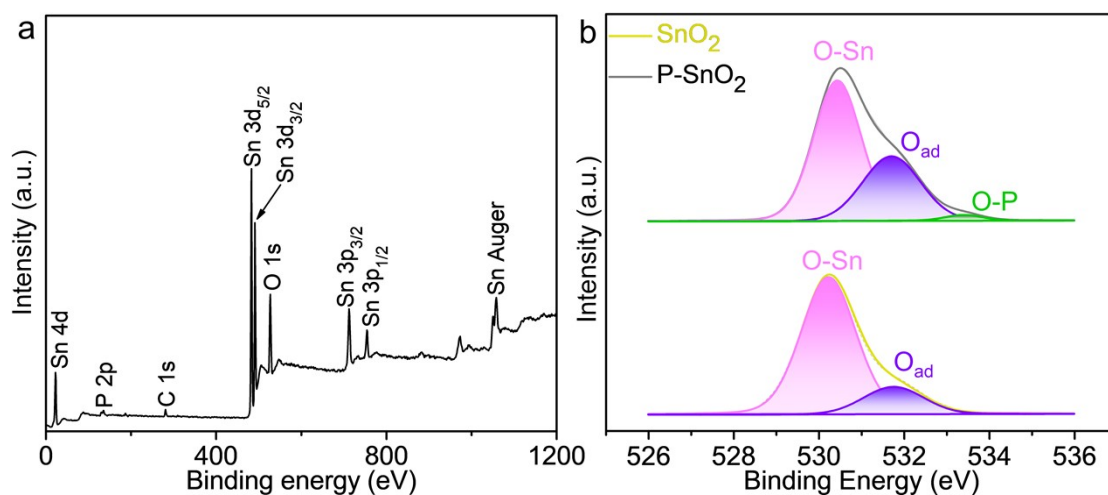

**Fig. S4.** (a) XPS survey spectrum of P-SnO<sub>2</sub> nanoparticles. (b) P 2p spectra of pristine and doped SnO<sub>2</sub> products. Comparing to the O 1s spectrum benchmark of pristine SnO<sub>2</sub> product, the peak locating at ~533.3 eV for P-SnO<sub>2</sub> sample should be ascribed to the oxidized P species.<sup>[1]</sup>

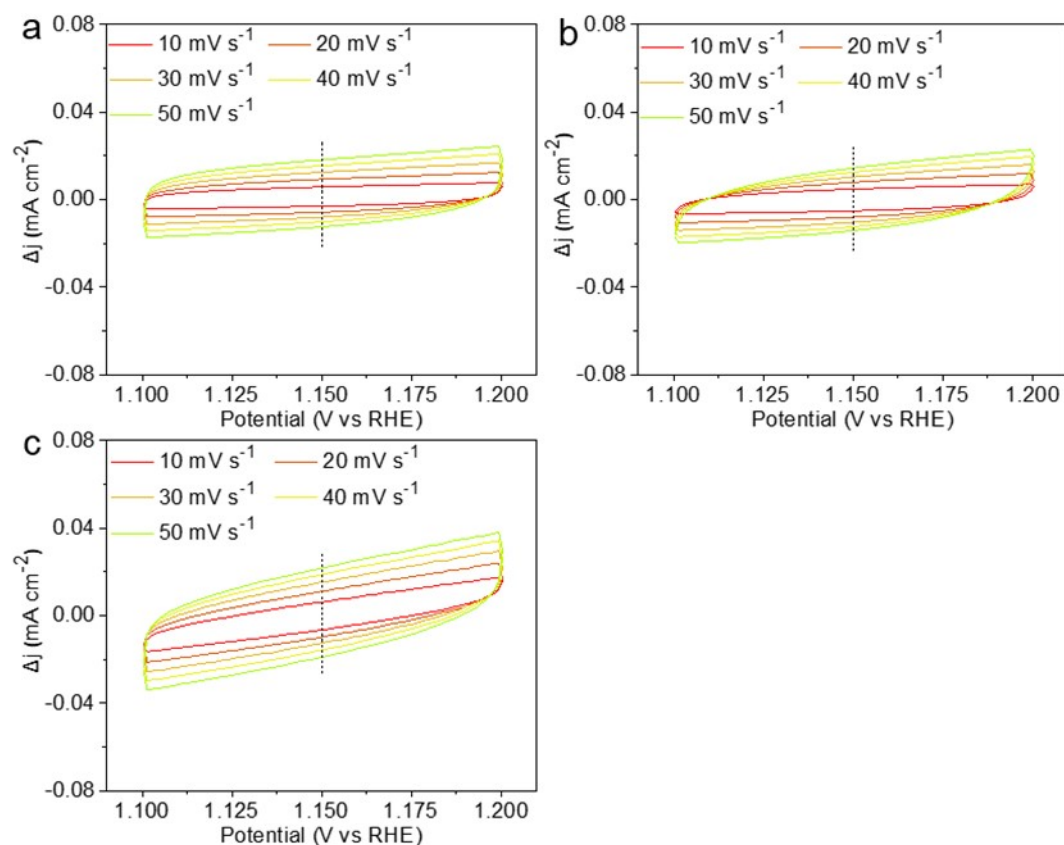

**Fig. S5.** Cyclic voltammetry (CV) curves of (a)  $\text{CoSn(OH)}_6$ , (b)  $\text{SnO}_2$  and (c)  $\text{P-SnO}_2$  nanoparticles at incremental scan rates.

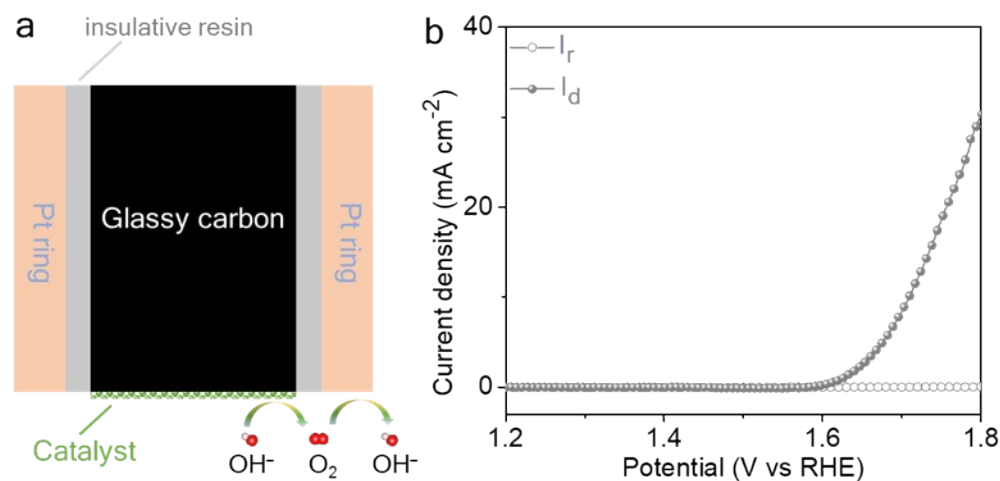

**Fig. S6.** (a) Scheme for the reaction process on a RRDE with the presence of an external voltage. (b) Rotating ring-disk electrode (RRDE) voltammogram at the ring voltage of 1.50 V vs RHE for the estimation of electron transfer number.

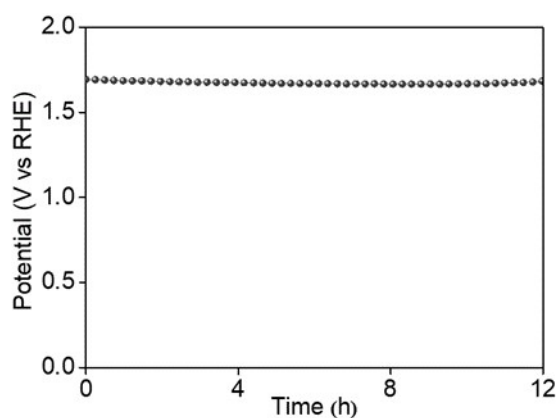

**Fig. S7.** Chronopotentiometry investigation at a constant current density of  $10 \text{ mA cm}^{-2}$  for P-SnO<sub>2</sub> product.

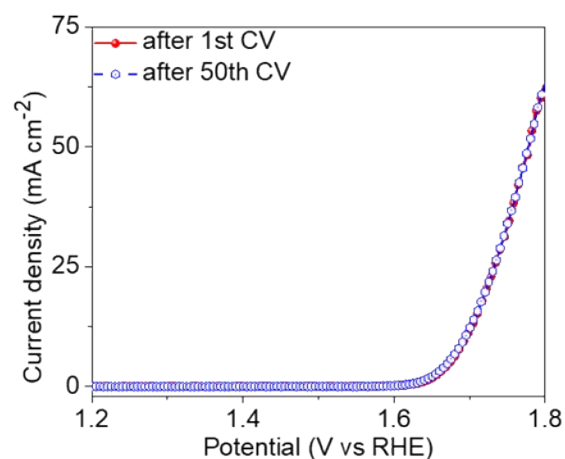

**Fig. S8.** LSV curves for P-SnO<sub>2</sub> product after the 1st and 50th CV scan. These two curves were rather similar, revealing the satisfactory electrochemical stability during continuous electrocatalysis.

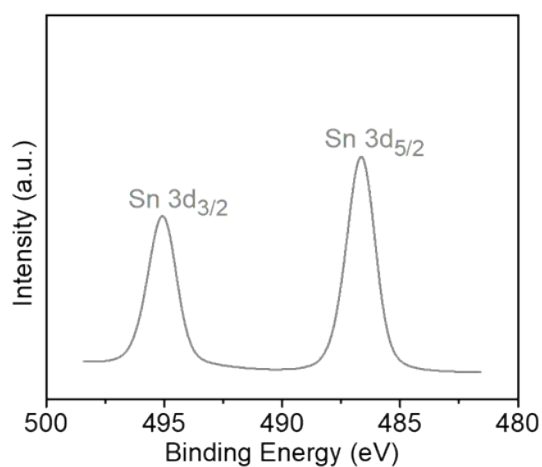

**Fig. S9.** Sn 3d spectrum of P-SnO<sub>2</sub> product after a chronopotentiometry measurement for 1000s. Typical peak features of SnO<sub>2</sub> phase were also detected, confirming the structural stability during electrocatalysis.

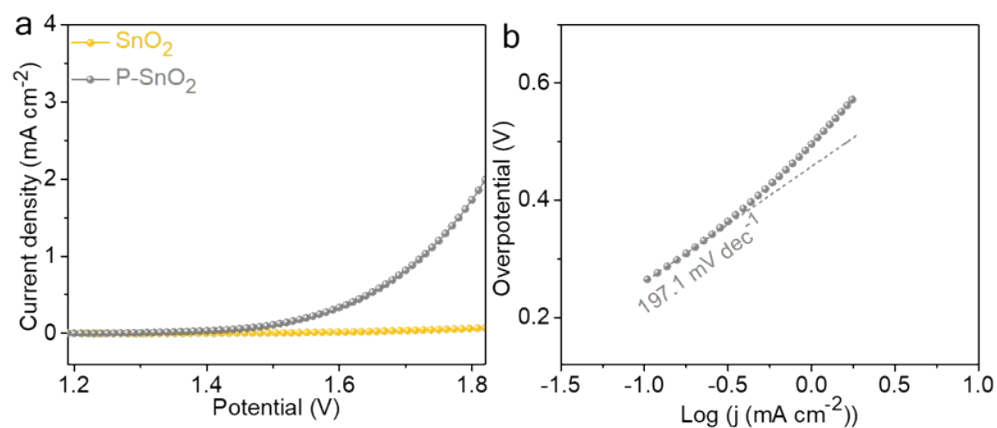

**Fig. S10.** Water oxidation activity in 1.0 M  $\text{H}_2\text{SO}_4$  solution. (a) LSV curves, (b) Tafel plot.

### References

- [1] X. Zhou, X. Liao, X. Pan, M. Yan, L. He, P. Wu, Y. Zhao, W. Luo and L. Mai, Unveiling the role of surface P-O group in P-doped  $\text{Co}_3\text{O}_4$  for electrocatalytic oxygen evolution by on-chip micro-device, *Nano Energy* 2021, **83**, 105748.
